# Supplementary material for: A Study on the Ability of Nanomaterials to Adsorb NO and SO2 from Combustion Gases and the Effectiveness of Their Separation
Source: MDPI journal article supplement (doi:10.3390/nano14100816), 2024-05-07
Supplement: s1 [file s1]

- *Supplementary materials* -

## **A Study on the Ability of Nanomaterials to Adsorb NO and SO<sub>2</sub> from Combustion Gases and the Effectiveness of Their Separation**

**Marius Constantinescu <sup>1</sup>, Felicia Bucura <sup>1,\*</sup>, Antoaneta Roman <sup>1,\*</sup>, Oana Romina Botoran <sup>1</sup>, Roxana-Elena Ionete <sup>1</sup>, Stefan Ionut Spiridon <sup>1</sup>, Eusebiu Ilarian Ionete <sup>1</sup>, Anca Maria Zaharioiu <sup>1</sup>, Florian Marin <sup>1,2</sup>, Silviu-Laurentiu Badea <sup>1</sup> and Violeta-Carolina Niculescu <sup>1,\*</sup>**

<sup>1</sup> National Research and Development Institute for Cryogenic and Isotopic Technologies—ICSI Ramnicu Valcea, 4th Uzinei Street, 240050 Ramnicu Valcea, Romania; marius.constantinescu@icsi.ro (M.C.)

<sup>2</sup> Faculty of Agricultural Sciences, Food Industry and Environmental Protection, “Lucian Blaga” University of Sibiu, 7-9 I. Ratiu Str., 550012 Sibiu, Romania

\* Correspondence: felicia.bucura@icsi.ro (F.B.); antoaneta.roman@icsi.ro (A.R.); violeta.niculescu@icsi.ro (V.-C.N.)

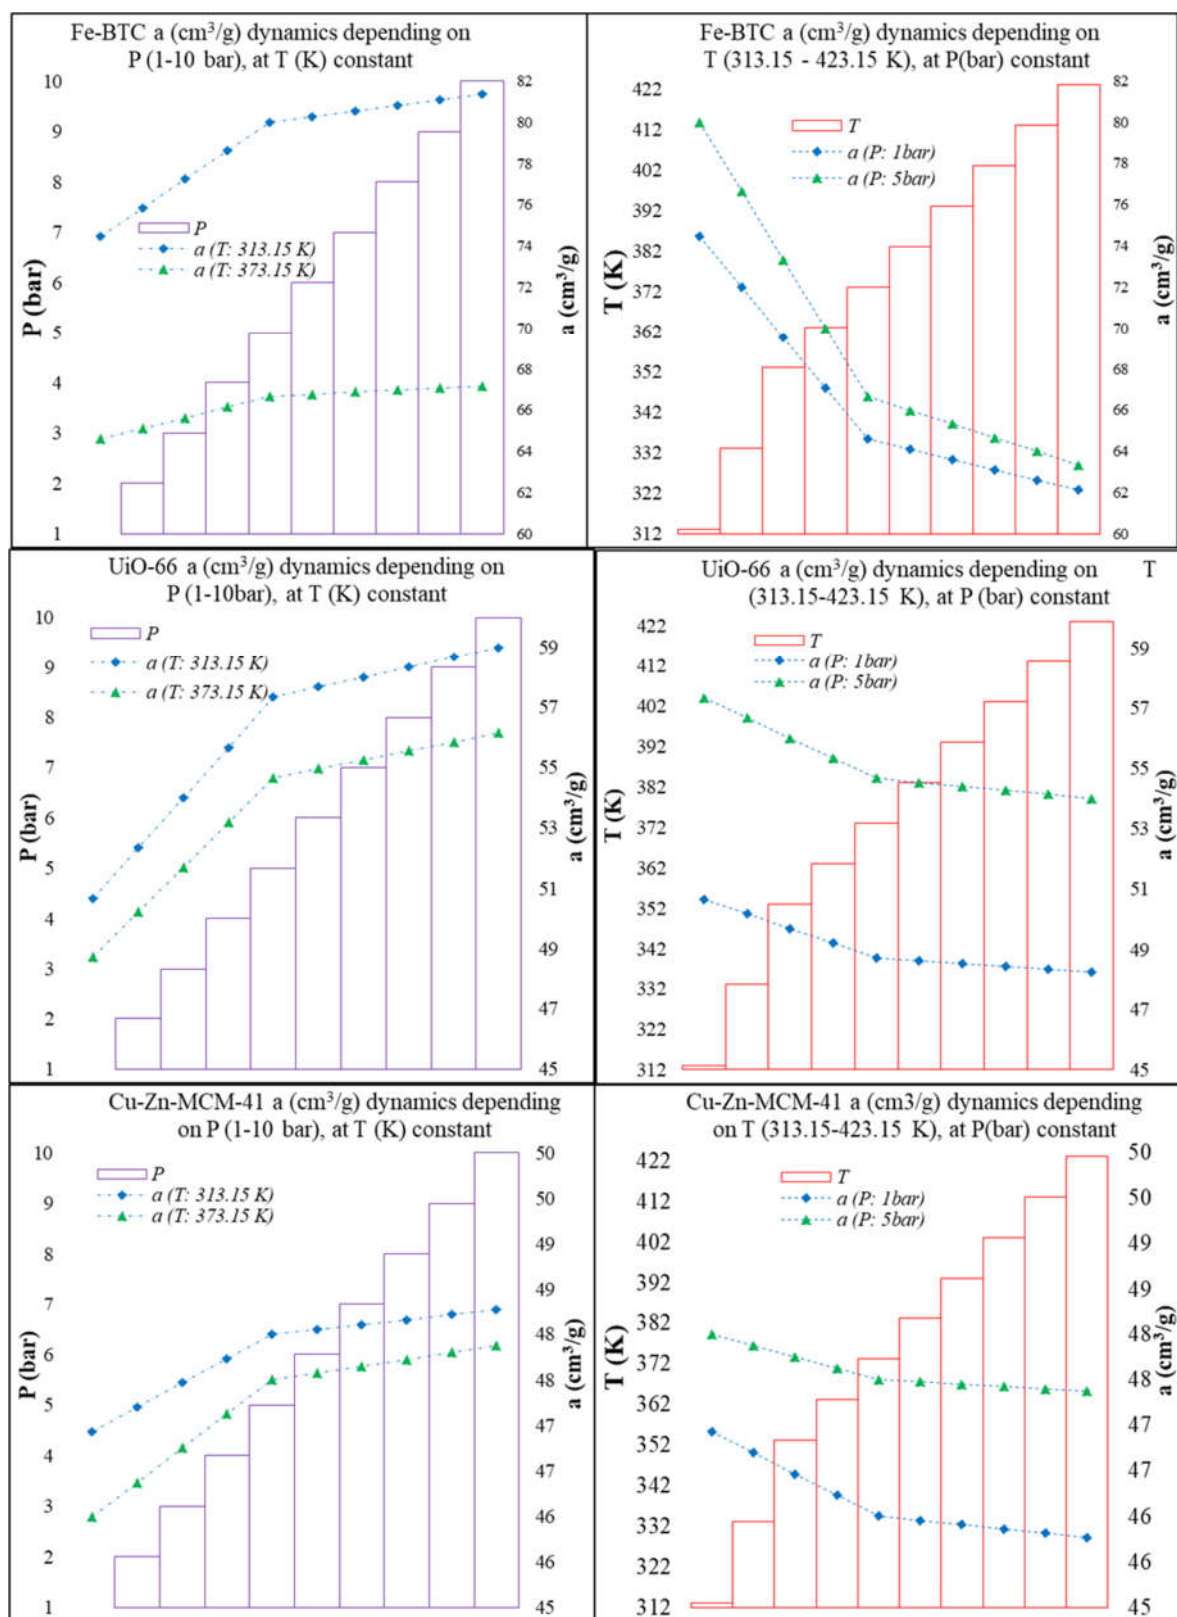

Figure S1. Synthesized nanomaterials adsorption capacity forecasts for NO.

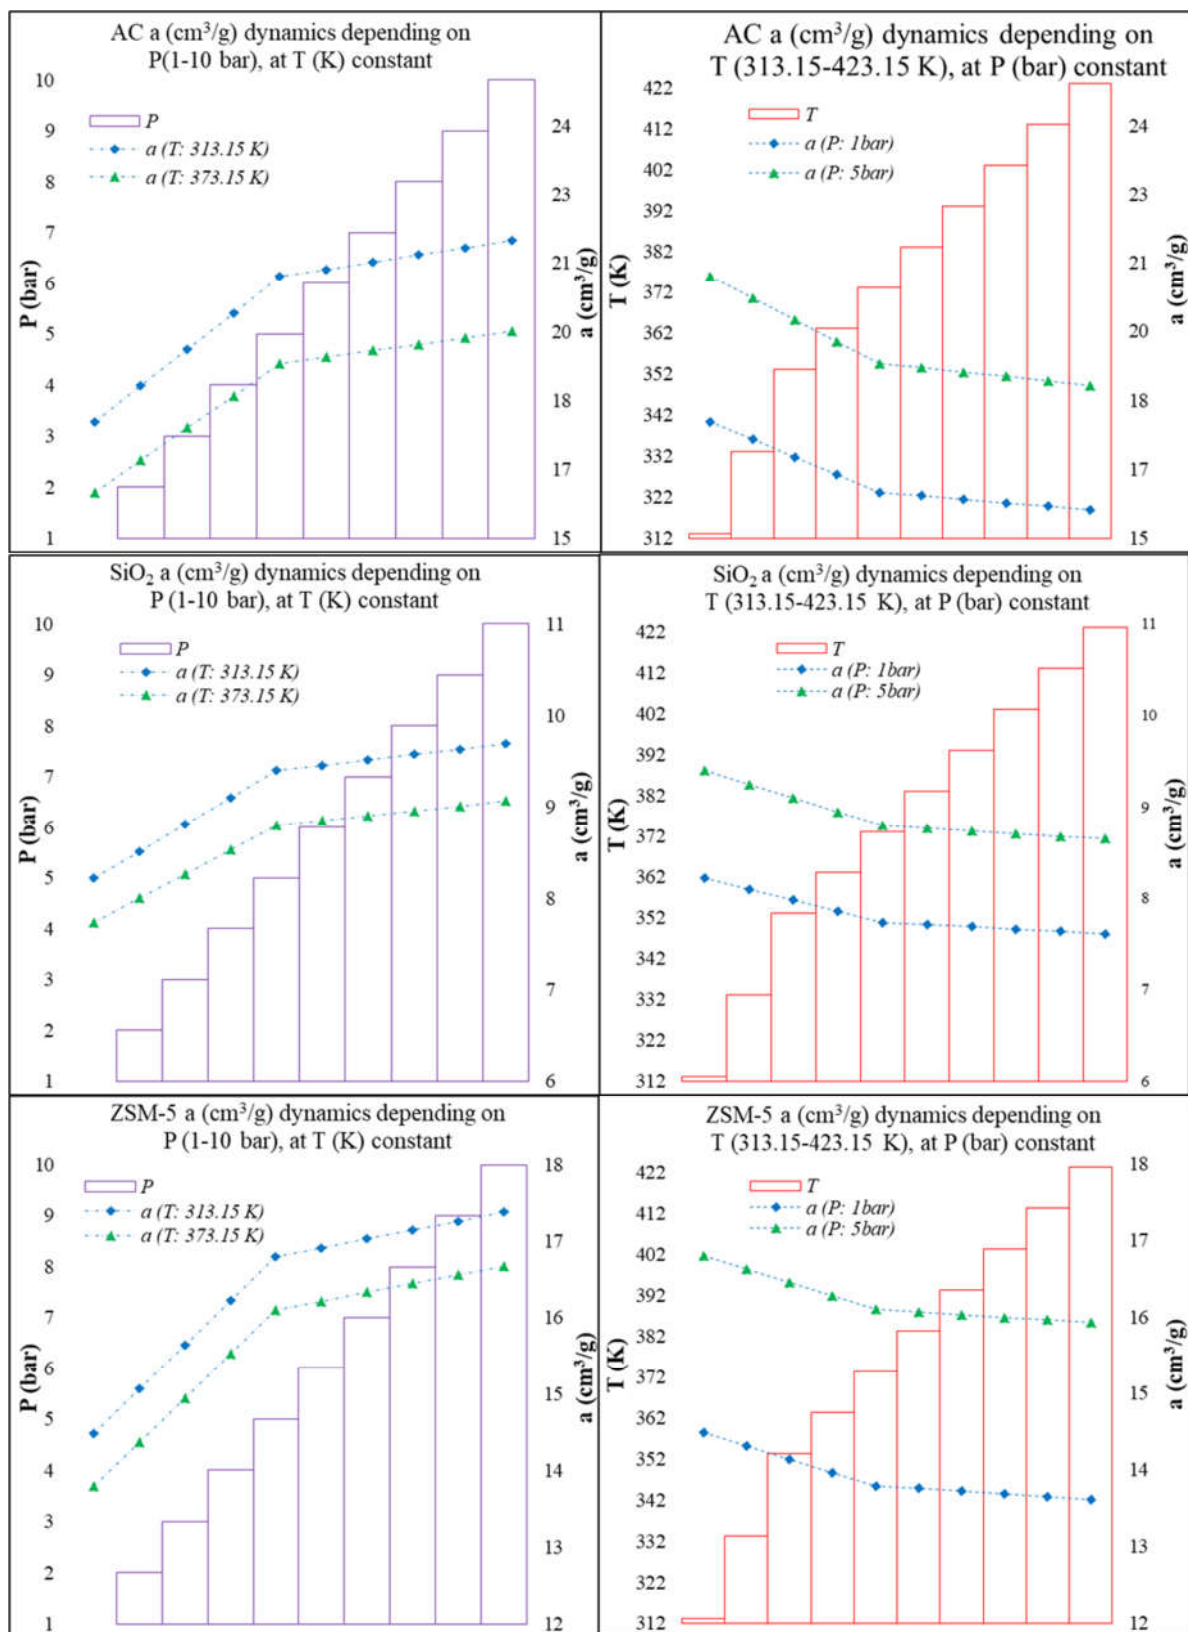

Figure S2. Commercial materials adsorption capacity forecasts for NO.

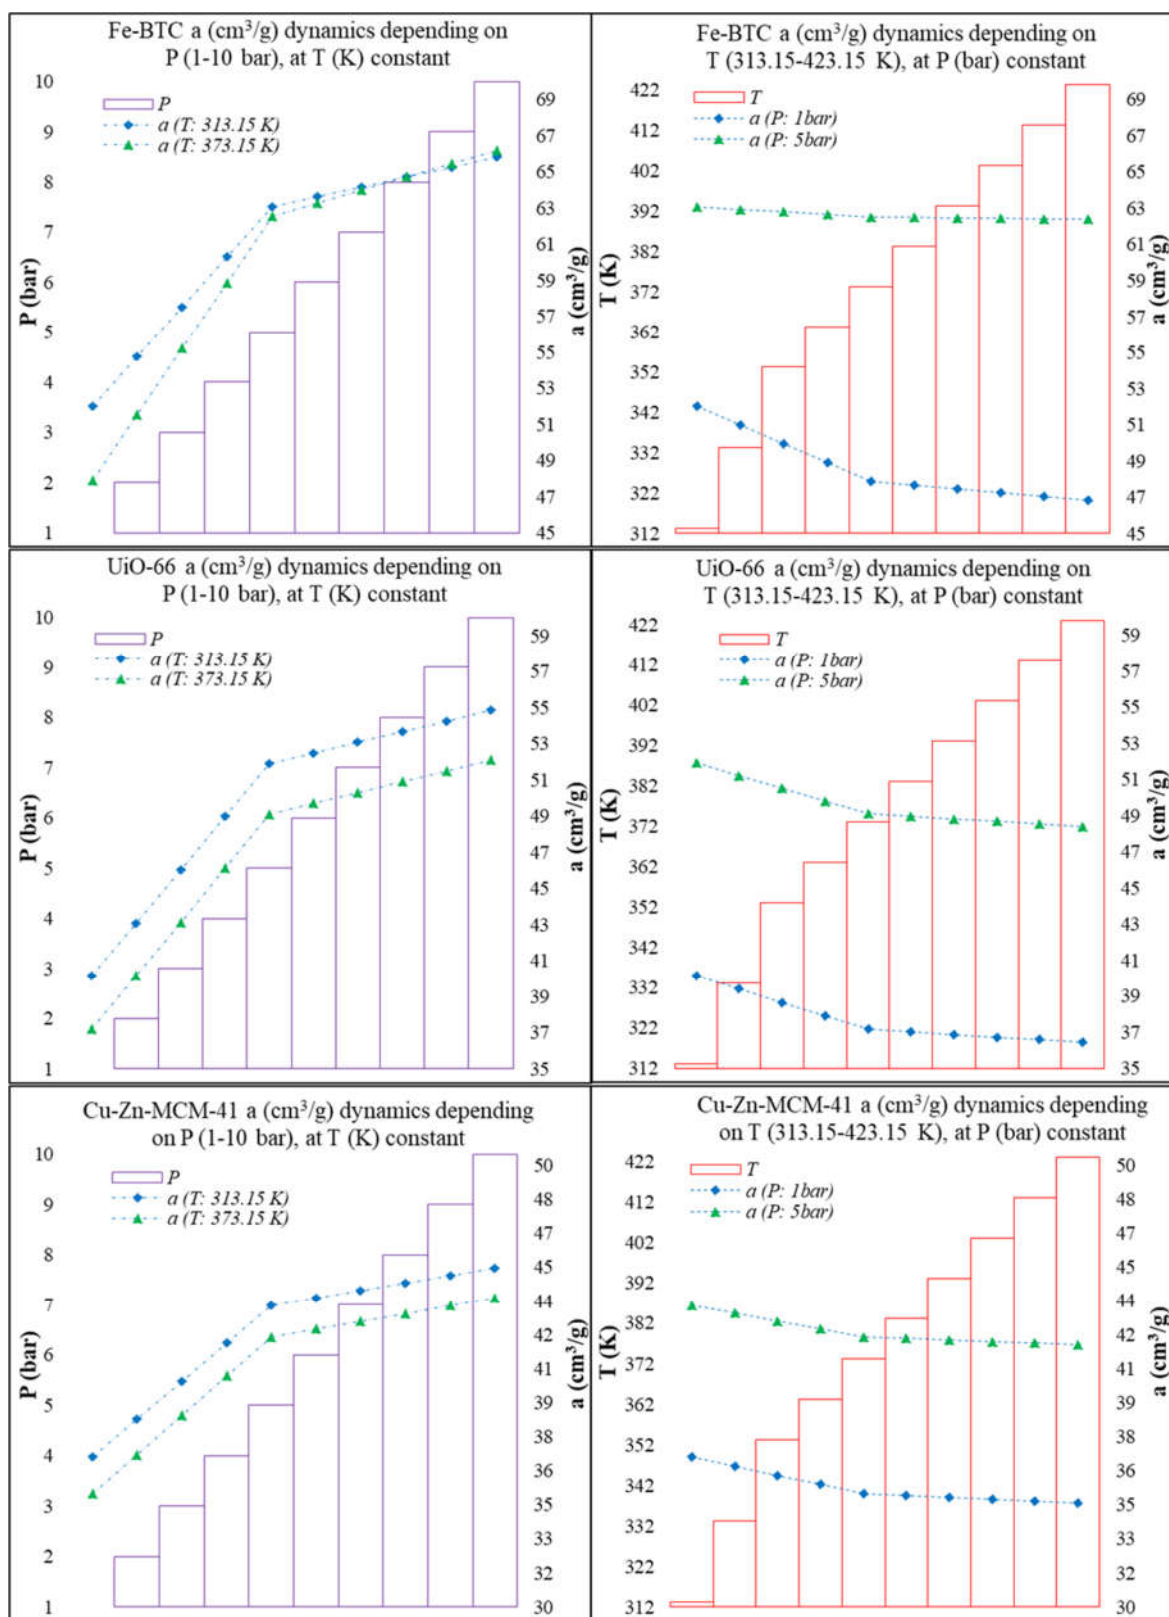

Figure S3. Synthesized nanomaterials adsorption capacity forecasts for SO<sub>2</sub>.

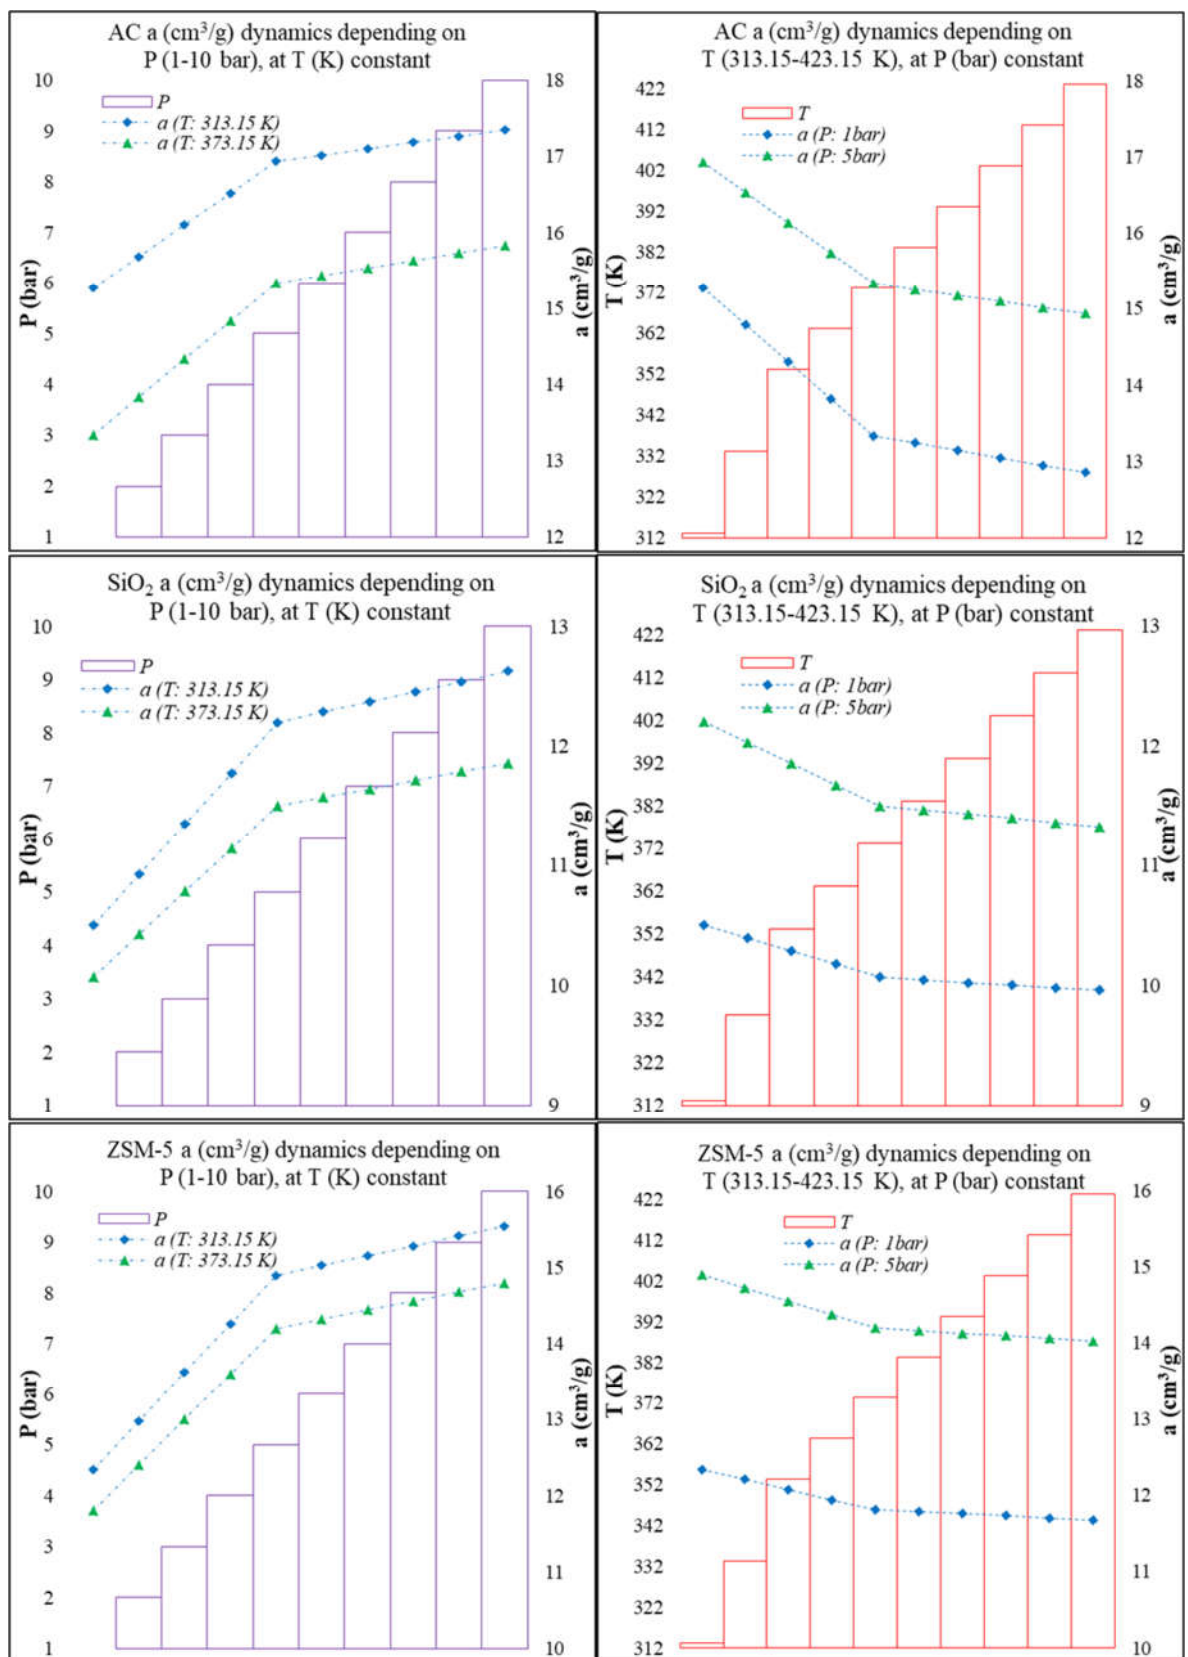

Figure S4. Commercial materials adsorption capacity forecasts for  $\text{SO}_2$ .
